# Supplementary material for: Adsorption Kinetics of Polystyrene and Poly(9-anthracenyl methyl methacrylate) onto SiO2 Surface Measured by Chip Nano-Calorimetry
Source: MDPI journal article supplement (doi:10.3390/polym14030605), 2022-02-03
Supplement: s1 [file s1]

# Supplementary Materials: Adsorption Kinetics of Polystyrene and Poly(9-anthracenyl methyl methacrylate) onto SiO<sub>2</sub> Surface Measured by the Chip Nano-Calorimetry

Mina Ishihara, Tomoya Watanabe and Takashi Sasaki

## S1. Morphology of the prepared films of PAMMA

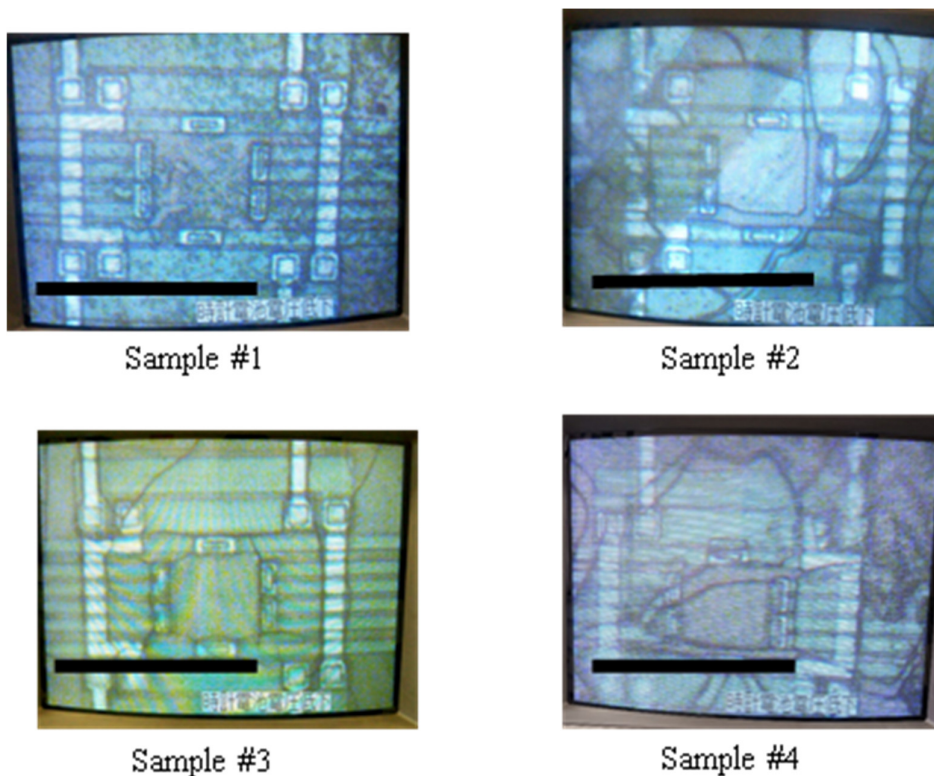

**Figure S1.** Optical micrographs of typical PAMMA films on the active area of the chip sensor after annealing at 433 K for ca. 10<sup>6</sup> s. The scale bar indicates 70 μm.
